# Supplementary material for: Organic–inorganic patchy particles as a versatile platform for fluid-in-fluid dispersion stabilisation
Source: Royal Society of Chemistry journal article supplement (doi:10.1039/c6fd00036c), 2016-01-01
Supplement: c6fd00036c1.pdf [file c6fd00036c1.pdf]

## Organic-inorganic patchy particles as a versatile platform for fluid-in-fluid dispersion stabilisation

E. Blanco,<sup>†a</sup> S. K. Smoukov,<sup>‡a</sup> O. D. Velev<sup>a\*</sup> and K. P. Velikov<sup>bc\*</sup>

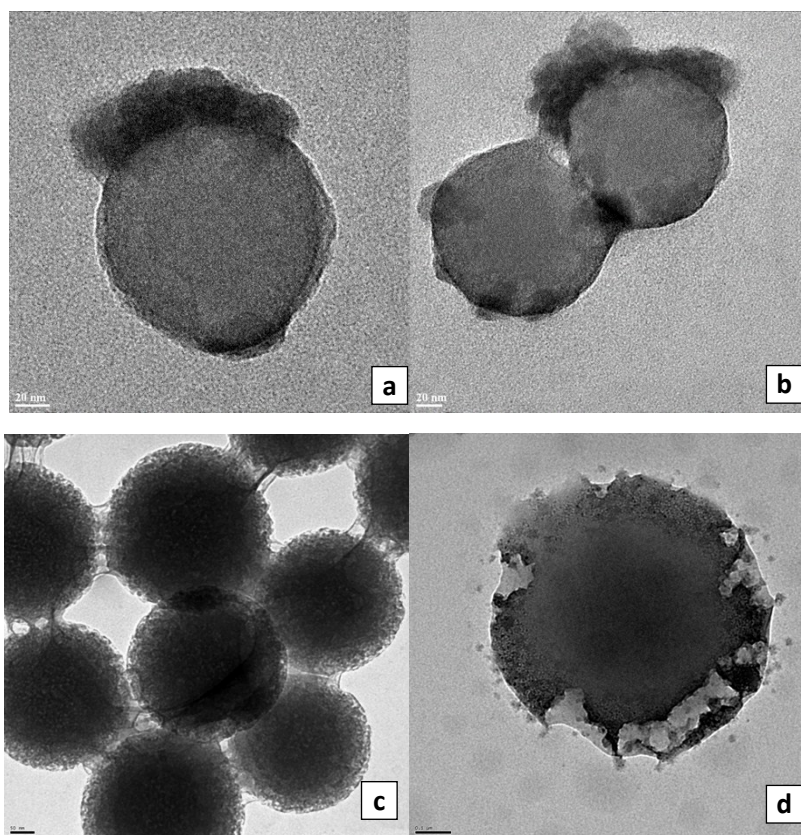

**Supplemental Figure 1S** TEM images of zein coated silica spheres. (a) and (b) Colloidal silica particles (100 nm) with zein patches at ZSSR = 5 mg/m<sup>2</sup>. (c) Unetched silica spheres (diameter ~ 330 nm) fully coated with a zein layer from solutions with ZSSR = 62 mg/m<sup>2</sup>. (d) Zein capsules obtained after partial dissolution of the silica core.

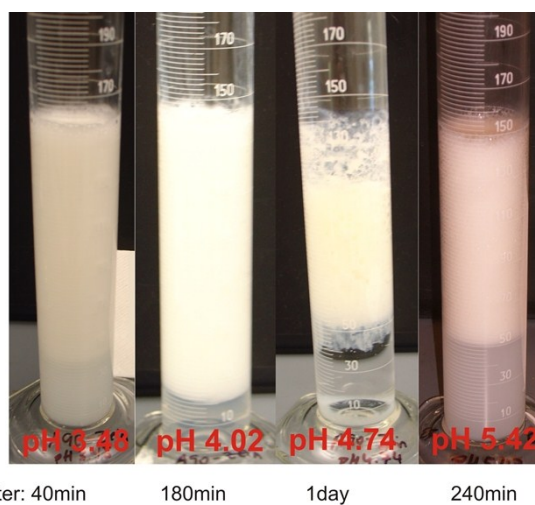

**Supplemental Figure 2S** Images of foam stabilized by heterogeneously patterned with zein silica particles. These images show the foam stability at different pH after different elapsed times.

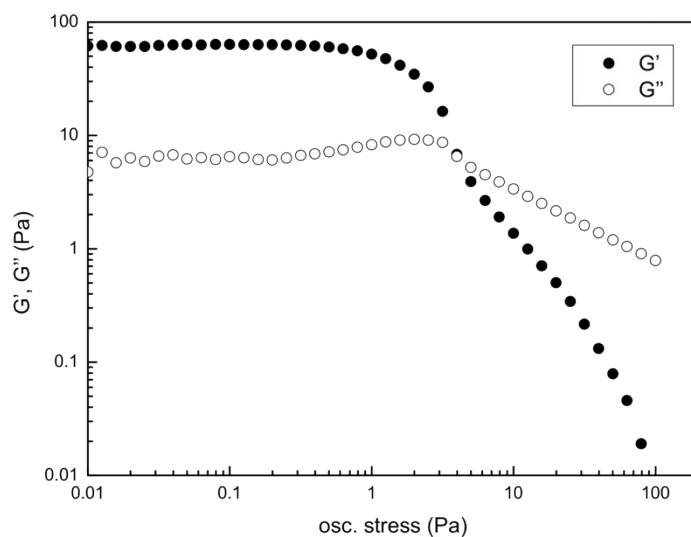

**Supplemental Figure 3S** Stress dependence of storage and loss moduli ( $G'$  and  $G''$ ) of a concentrated (O/W) emulsion ( $\phi_w = 0.23$ ). The applied frequency was 1 Hz.
